# Supplementary material
Source: MDPI journal article supplement (https://www.mdpi.com/2073-4433/12/9/1129)
Supplement: s1 [file s1]

# **Supplemental Information for Emission of PM<sub>2.5</sub>-bound Polycyclic Aromatic Hydrocarbons from Biomass and Coal Combustion in China**

**Xinghua Li,\* Zihao Wang, Tailun Guo**

School of Space and Environment, Beihang University, Beijing, 100191, China

\*Correspondence: [lixinghua@buaa.edu.cn](mailto:lixinghua@buaa.edu.cn); Tel.: 86-10-61716674

# Content

**Table S1.** Description of combustion sources

**Table S2.** Proximate analysis and ultimate analysis for the tested biomass and fuel

**Table S3.** Summary of emission factors of PAHs (mg/kg fuel burned) from various combustion sources in the literatures

**Table S1.** Description of combustion sources

| Source type                                  | Stove/boiler type and specification                                                          | Fuel type                                 | APCDs          | Test load (%) |
|----------------------------------------------|----------------------------------------------------------------------------------------------|-------------------------------------------|----------------|---------------|
| Open burning                                 |                                                                                              | wheat straw<br>maize stover               | None           |               |
| Household biofuel burning                    | improved stove with an enclosed combustion chamber and a chimney, built-in-place brick stove | wheat straw<br>maize stover<br>woody fuel | None           |               |
| household coal combustion                    | built-in-place brick stove with a chimney                                                    | bituminous coal                           | None           |               |
| coal-fired boiler for electricity generation | Pulverized coal boiler with a steam flow rate of 670 t/h                                     | bituminous coal                           | ESP+WFGD       | 100           |
| coal-fired industrial boilers                | chain-grate boiler with nominal capacity of 20 t/h                                           | bituminous coal                           | spray scrubber | 80            |
|                                              | chain-grate boiler with nominal capacity of 4 t/h                                            | bituminous coal                           | cyclone        | 80            |

**Table S2.** Proximate analysis and ultimate analysis for the tested biomass and fuel

| Source type                                     | Fuel type       | Proximate analysis (as received, %) |                 |            |       | Ultimate analysis (dry basis, %) |      |      |      |
|-------------------------------------------------|-----------------|-------------------------------------|-----------------|------------|-------|----------------------------------|------|------|------|
|                                                 |                 | moisture                            | volatile matter | fix carbon | ash   | C                                | H    | N    | S    |
| Open burning                                    | wheat straw     | 9.59                                | 65.54           | 18.83      | 6.04  | 44.80                            | 7.01 | 0.56 | 0.17 |
|                                                 | maize stover    | 8.79                                | 68.93           | 18.43      | 3.85  | 41.09                            | 6.85 | 1.62 | 0.20 |
| Household biofuel<br>burning                    | wheat straw     | 10.32                               | 69.61           | 14.74      | 5.33  | 44.80                            | 7.01 | 0.56 | 0.17 |
|                                                 | maize stover    | 8.90                                | 63.58           | 17.20      | 10.32 | 41.09                            | 6.85 | 1.62 | 0.20 |
|                                                 | woody fuel      | 9.49                                | 74.35           | 15.19      | 0.97  | 47.66                            | 7.20 | 0.15 |      |
| household coal<br>combustion                    | bituminous coal | 7.04                                | 33.91           | 53.71      | 5.35  | 70.02                            | 3.87 | 0.94 | 0.23 |
| coal-fired boiler for<br>electricity generation | bituminous coal | 6.5                                 | 25.17           |            | 32.65 | 51.44                            |      |      | 1.01 |
| coal-fired industrial<br>boilers                | bituminous coal | 10.11                               | 29.60           | 53.69      | 6.60  | 71.41                            | 4.50 | 0.94 | 0.23 |
|                                                 | bituminous coal | 16.3                                | 22.56           | 26.53      | 34.61 | 43.87                            | 3.43 | 0.92 | 0.96 |

**Table S3.** Summary of emission factors of PAHs (mg/kg fuel burned) from various combustion sources in the literatures

| Source type                          | Fuel type                    | APCDs | Sampling method   | Samples                        | EF                 | Reference |
|--------------------------------------|------------------------------|-------|-------------------|--------------------------------|--------------------|-----------|
| Household stove                      |                              |       |                   |                                |                    |           |
| cookstove(L <sup>a</sup> )           | wood                         | None  | hs <sup>f</sup>   | p <sup>c</sup> +g <sup>d</sup> | 110.2              | S1        |
|                                      | coal briquette               |       |                   |                                | 101.5              |           |
|                                      | charcoal                     |       |                   |                                | 24.7               |           |
| stove (L)                            | fuelwood                     | None  | dilution sampling | p                              | 2.0-3.2            | S2        |
|                                      | dung-cake                    |       |                   | p                              | 3.1-5.5            |           |
|                                      | biofuel briquette            |       |                   | p                              | 2.8-3.0            |           |
| stove (L)                            | honeycomb coal briquette     | None  | dilution sampling | p+g                            | 69-160             | S3        |
| stove (L)                            | coal chunk                   | None  | dilution sampling | PM <sub>2.5</sub>              | 0.13-5.2           | S4        |
|                                      | coal briquette               |       |                   |                                | 0.53-23.9          |           |
| stove (L)                            | biofuel<br>biofuel briquette | None  | dilution sampling | PM <sub>2.5</sub>              | 0.18-18.7          | S5        |
| stove (L)                            | biofuel<br>coal              | None  | naturally cooled  | p+g                            | 5.2-47.3<br>41-405 | S6        |
| improve metal stove(F <sup>b</sup> ) | coal briquette               | None  | naturally diluted | p+g                            | 13-15              | S7        |
| brick stove(F)                       | coal cake                    |       |                   |                                | 148-210            |           |
| metal stove without chimney(F)       | wood                         |       |                   |                                | 141-276            |           |
| cookstove (F)                        | crop straw                   | None  | naturally diluted | p+g                            | 120-550            | S8        |
| coal stove (F)                       | anthracite coal chunk        | None  | naturally diluted | p+g                            | 26.0±30.4          | S9        |
| biofuel gasifier stove(F)            | wood                         |       |                   |                                | 74.2±50.1          |           |
| stove (F)                            | bituminous coal              | None  | dilution sampling | PM <sub>2.5</sub>              | 68.7±21.8          | S10       |
|                                      | anthracite coal              |       |                   |                                | 1.7±0.9            |           |
|                                      | biofuel                      |       |                   |                                | 29.5-83.3          |           |
| heated kang                          | biofuel                      | None  | dilution sampling | PM <sub>2.5</sub>              | 84.5-344           | S11       |
| traditional stove semi-gasifier (F)  | coal                         |       |                   |                                | 38-206             |           |
| brick stove (F)                      | biofuel                      | None  | naturally diluted | p                              | 21.7-429           | S12       |
| traditional iron stoves(F)           | wood                         |       |                   |                                | 106-254            |           |
|                                      | coal chunk                   |       |                   |                                | 62.2               |           |
|                                      | honeycomb                    |       |                   |                                | 18.3               |           |
| gasifier stove(F)                    | wood                         |       |                   |                                | 24.6               |           |
| Open burning                         |                              |       |                   |                                |                    |           |
| wind tunnel simulation               | cereals                      | None  | dilution sampling | p+g                            | 7.9-359            | S13       |
|                                      | wood                         |       |                   |                                | 14.2-30.6          |           |
| lab simulation                       | wheat straw                  | None  | dilution          | PM <sub>2.5</sub>              | 1.8                | S14       |

|                   |                                            |               |                      |                   |             |     |
|-------------------|--------------------------------------------|---------------|----------------------|-------------------|-------------|-----|
|                   | rice straw                                 |               | sampling             |                   | 15.7        |     |
| lab simulation    | rice straw<br>maize residue<br>leaf litter | None          | dilution<br>sampling | PM <sub>10</sub>  | 0.47-0.91   | S15 |
| lab simulation    | rice straw                                 | None          | dilution             | PM                | 2.2±0.2     | S16 |
| field measurement | rice straw                                 |               | sampling             | PM <sub>2.5</sub> | 16.6±1.7    |     |
| Coal-fired boiler |                                            |               |                      |                   |             |     |
| PC boiler         | bituminous coal                            | ESP           | hs <sup>f</sup>      | p+g               | 0.003-0.018 | S17 |
| PC boiler         | Indonesian coal<br>Australian coal         | SCR+ESP+WFGD  | hs <sup>f</sup>      | p+g               | 0.002       | S18 |
| PC boiler         | Bituminous coal                            | ESP           | hs <sup>f</sup>      | p+g               | 0.6         | S19 |
| PC boiler         | Bituminous coal                            | SCR+BH+SWFGD  | hs <sup>f</sup>      | p+g               | 0.24        | S20 |
| PC boiler         | Bituminous coal                            | SCR+ESP+WFGD  | hs <sup>f</sup>      | p+g               | 0.44        |     |
| CFB boiler        | bituminous coal                            | fabric filter | hs <sup>f</sup>      | p+g               | 3.53        | S21 |

<sup>a</sup>L: lab simulation. <sup>b</sup>F: field measurement. <sup>c</sup>p: particulate phase. <sup>d</sup>g: gas phase. <sup>f</sup>hs: hot temperature sampling

## References

- S1. Kim Oanh, N.T.; Bætz Reutergårdh, L.; Dung, N.T. Emission of Polycyclic Aromatic Hydrocarbons and Particulate Matter from Domestic Combustion of Selected Fuels. *Environ. Sci. Technol.* **1999**, *33*, 2703–2709.
- S2. Venkataraman, C.; Negi, G.; Sardar, S.B.; Rastogi, R. Size distributions of polycyclic aromatic hydrocarbons in aerosol emissions from biofuel combustion. *J. Aerosol Sci.* **2002**, *33*, 503–518.
- S3. Chen, Y. J.; Sheng, G. Y.; Bi, X. H.; Feng, Y. L.; Mai, B. X.; Fu, J. M. Emission factors for carbonaceous particles and polycyclic aromatic hydrocarbons from residential coal combustion in China. *Environ. Sci. Technol.* **2005**, *39*, 1861-1867.
- S4. Chen, Y. J.; Zhi, G. R.; Feng, Y. L.; Tian, C. G.; Bi, X. H.; Li, J.; Zhang, G. Increase in polycyclic aromatic hydrocarbon (PAH) emissions due to briquetting: A challenge to the coal briquetting policy. *Environ. Pollut.* **2015**, *204*, 58-63.
- S5. Sun, J.; Shen, Z. X.; Zeng, Y. L.; Niu, X. Y.; Wang, J. H.; Cao, J. J.; Gong, X. S.; Xu, H. M.; Wang, T. B.; Liu, H. X.; Yang, L. Characterization and cytotoxicity of PAHs in PM<sub>2.5</sub> emitted from residential solid fuel burning in the Guanzhong Plain, China. *Environ. Pollut.* **2018**, *241*, 359-368.
- S6. Shen, G. F.; Tao, S.; Wei, S. Y.; Chen, Y. C.; Zhang, Y. Y.; Shen, H. Z.; Huang, Y.; Zhu, D.; Yuan, C. Y.; Wang, H. C.; Wang, Y. F.; Pei, L. J.; Liao, Y. L.; Duan, Y. H.; Wang, B.; Wang, R.; Lv, Y.; Li, W.; Wang, X. L.; Zheng, X. Y. Field Measurement of Emission Factors of PM, EC, OC, Parent, Nitro-, and Oxy-Polycyclic Aromatic Hydrocarbons for Residential Briquette, Coal Cake, and Wood in Rural Shanxi, China. *Environ. Sci. Technol.* **2013**, *47*, 2998-3005.
- S7. Shen, G.F.; Tao, S.; Wei, S.Y.; Chen, Y.C.; Zhang, Y.Y.; Shen, H.Z.; Huang, Y.; Zhu, D.; Yuan, C.Y.; Wang, H.C.; et al. Field Measurement of Emission Factors of PM, EC, OC, Parent, Nitro-, and Oxy-Polycyclic Aromatic Hydrocarbons for Residential Briquette, Coal Cake, and Wood in Rural Shanxi, China. *Environ. Sci. Technol.* **2013**, *47*, 2998–3005.
- S8. Wei, S. Y.; Shen, G. F.; Zhang, Y. Y.; Xue, M.; Xie, H.; Lin, P. C.; Chen, Y. C.; Wang, X. L.; Tao, S. Field measurement on the emissions of PM, OC, EC and PAHs from indoor crop straw burning in rural China. *Environ. Pollut.* **2014**, *184*, 18-24.
- S9. Shen, G. F.; Chen, Y. C.; Xue, C. Y.; Lin, N.; Huang, Y.; Shen, H. Z.; Wang, Y. L.; Li, T. C.; Zhang, Y. Y.; Su, S.; Huangfu, Y. B.; Zhang, W. H.; Chen, X. F.; Liu, G. Q.; Liu, W. X.; Wang, X. L.; Wong, M. H.; Tao, S. Pollutant Emissions from Improved Coal- and Wood-Fuelled Cookstoves in Rural Households. *Environ. Sci. Technol.* **2015**, *49*, 6590-6598.
- S10. Sun, J.; Shen, Z.X.; Zeng, Y.L.; Niu, X.Y.; Wang, J.H.; Cao, J.J.; Gong, X.S.; Xu, H.M.; Wang, T.B.; Liu, H.X.; et al. Characterization and cytotoxicity of PAHs in PM<sub>2.5</sub> emitted from residential solid fuel burning in the Guanzhong Plain, China. *Environ. Pollut.* **2018**, *241*, 359–368.

- S11. Zhang, Y.; Shen, Z. X.; Sun, J.; Zhang, L. M.; Zhang, B.; Zou, H. J.; Zhang, T.; Ho, S. S. H.; Chang, X. J.; Xu, H. M.; Wang, T.; Cao, J. J. Parent, alkylated, oxygenated and nitrated polycyclic aromatic hydrocarbons in PM<sub>2.5</sub> emitted from residential biomass burning and coal combustion: A novel database of 14 heating scenarios. *Environ. Pollut.* **2021**, *268*, 115881.
- S12. Du, W.; Wang, J. Z.; Zhuo, S. J.; Zhong, Q. R.; Wang, W.; Chen, Y. C.; Wang, Z. L.; Mao, K.; Huang, Y.; Shen, G. F.; Tao, S. Emissions of particulate PAHs from solid fuel combustion in indoor cookstoves. *Sci. Total Environ.* **2021**, *771*, 145411.
- S13. Jenkins, B.M.; Jones, A.D.; Turn, S.Q.; Williams, R.B. Emission Factors for Polycyclic Aromatic Hydrocarbons from Biomass Burning. *Environ. Sci. Technol.* **1996**, *30*, 2462–2469.
- S14. Hays, M. D.; Fine, P. M.; Geron, C. D.; Kleeman, M. J.; Gullett, B. K., Open burning of agricultural biomass: Physical and chemical properties of particle-phase emissions. *Atmos. Environ.* **2005**, *39*, 6747–6764.
- S15. Wiriya, W.; Chantara, S.; Sillapapiromsuk, S.; Lin, N. H. Emission Profiles of PM<sub>10</sub>-Bound Polycyclic Aromatic Hydrocarbons from Biomass Burning Determined in Chamber for Assessment of Air Pollutants from Open Burning. *Aerosol Air Qual. Res.* **2016**, *16*, 2716–2727.
- S16. Oanh, N. T. K.; Ly, B. T.; Tipayarom, D.; Manandhar, B. R.; Prapat, P.; Simpson, C. D.; Liu, L. J. S. Characterization of particulate matter emission from open burning of rice straw. *Atmos. Environ.* **2011**, *45*, 493–502.
- S17. Yin, X.F.; Yang, W.T.; Xue, H.M. PAHs Emission Characteristics and Assessment from the Coal Combustion Process in the Large Capacity Power Plant Boilers. In *Advanced Materials Research*; Trans Tech Publications Ltd.: Bäch SZ, Switzerland, **2013**; Volume 726–731, pp. 1908–1916.
- S18. Hsu, W. T.; Liu, M. C.; Hung, P. C.; Chang, S. H.; Chang, M. B. PAH emissions from coal combustion and waste incineration. *J. Hazard. Mater.* **2016**, *318*, 32–40.
- S19. Yang, H.H.; Lee, W.J.; Chen, S.J.; Lai, S.O. PAH emission from various industrial stacks. *J. Hazard. Mater.* **1998**, *60*, 159–174.
- S20. Lu, C. M.; Dat, N. D.; Lien, C. K.; Chi, K. H.; Chang, M. B. Characteristics of Fine Particulate Matter and Polycyclic Aromatic Hydrocarbons Emitted from Coal Combustion Processes. *Energy Fuels* **2019**, *33*, 10247–10254.
- S21. Wang, R. W.; Liu, G. J.; Sun, R. Y.; Yousaf, B.; Wang, J. Z.; Liu, R. Q.; Zhang, H. Emission characteristics for gaseous- and size-segregated particulate PAHs in coal combustion flue gas from circulating fluidized bed (CFB) boiler. *Environ. Pollut.* **2018**, *238*, 581–589.
